# Supplementary material for: Comparison of RNA- and DNA-based 16S amplicon sequencing to find the optimal approach for the analysis of the uterine microbiome
Source: Springer Nature journal article supplement (doi:10.1038/s41598-025-00969-5), 2025-05-16

## Full images of agarose gel electrophoresis

Figure S1

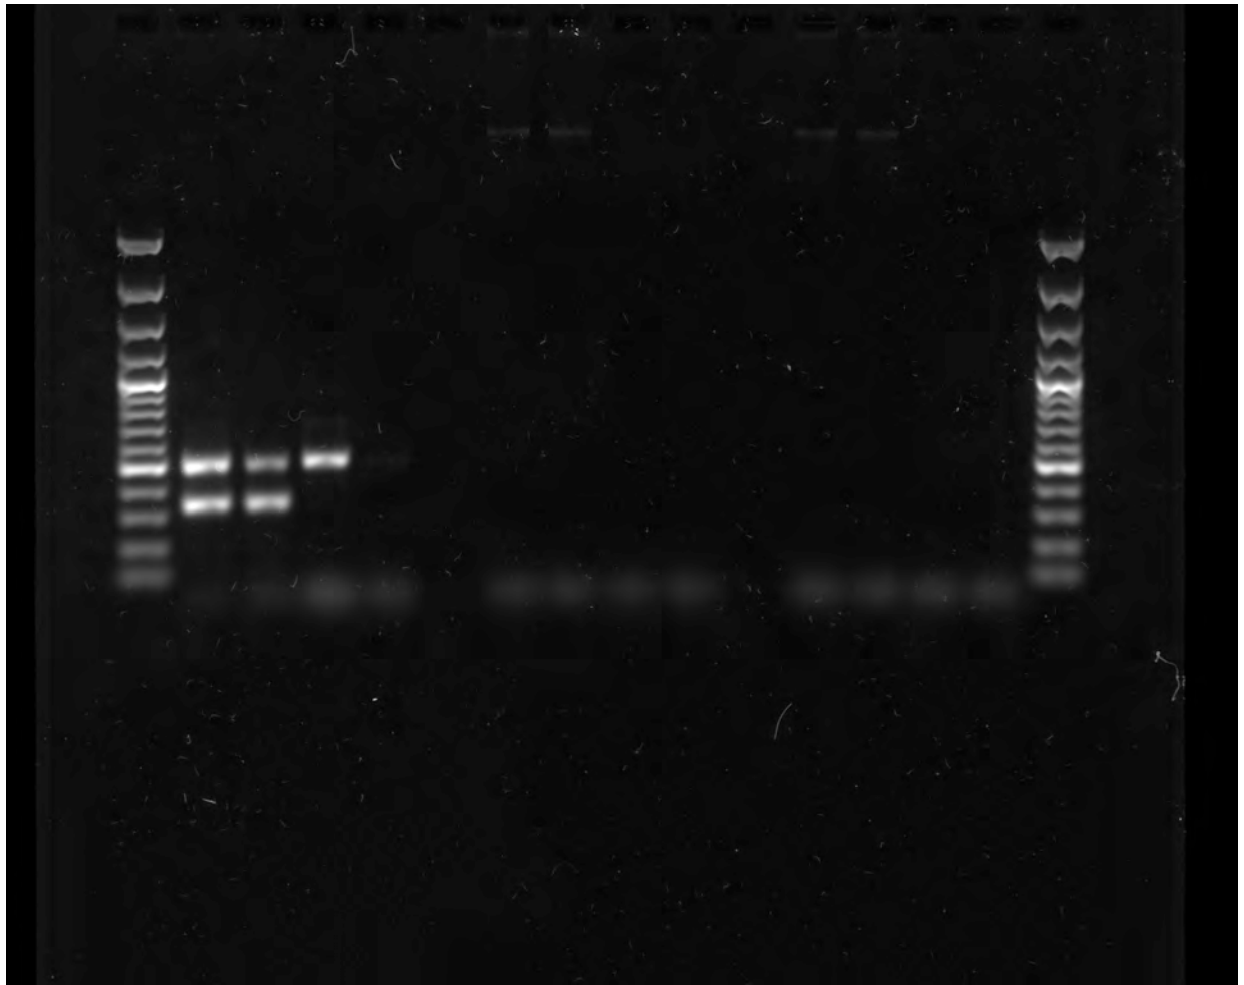

Figure S2

A

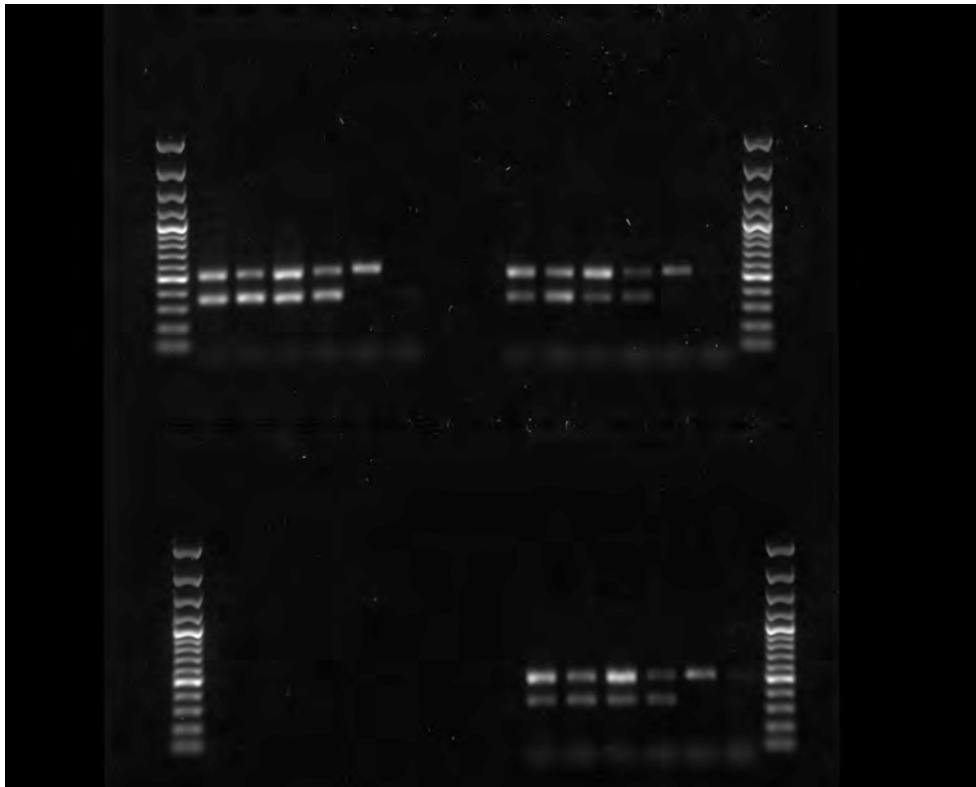

B (images of all 3 DNA samples)

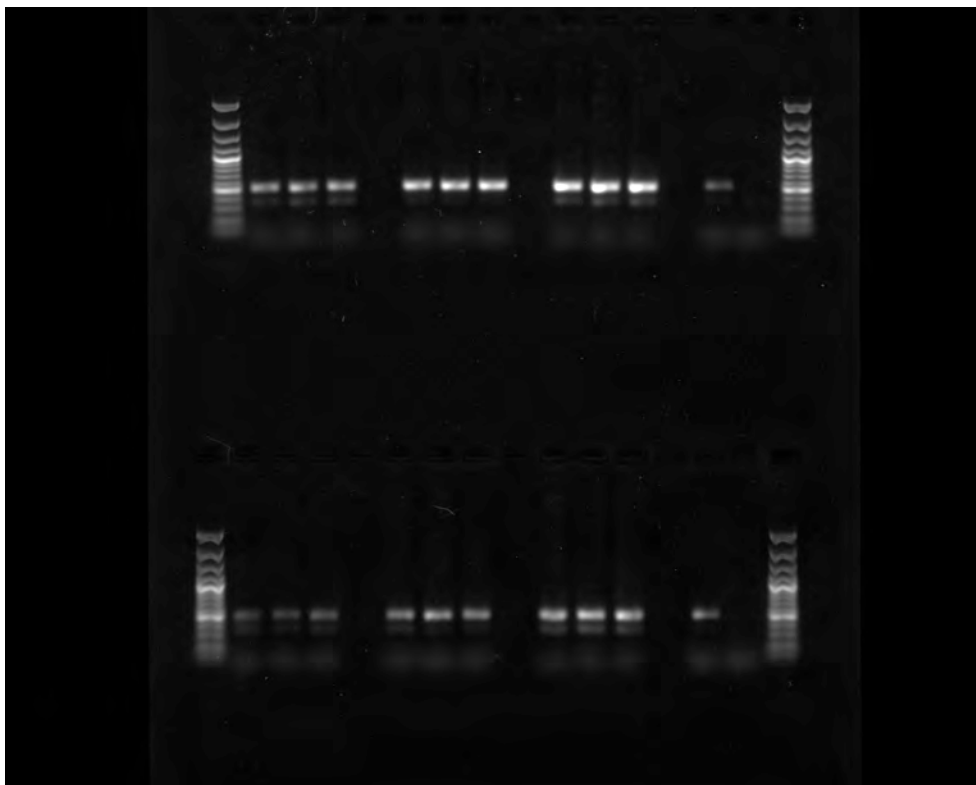

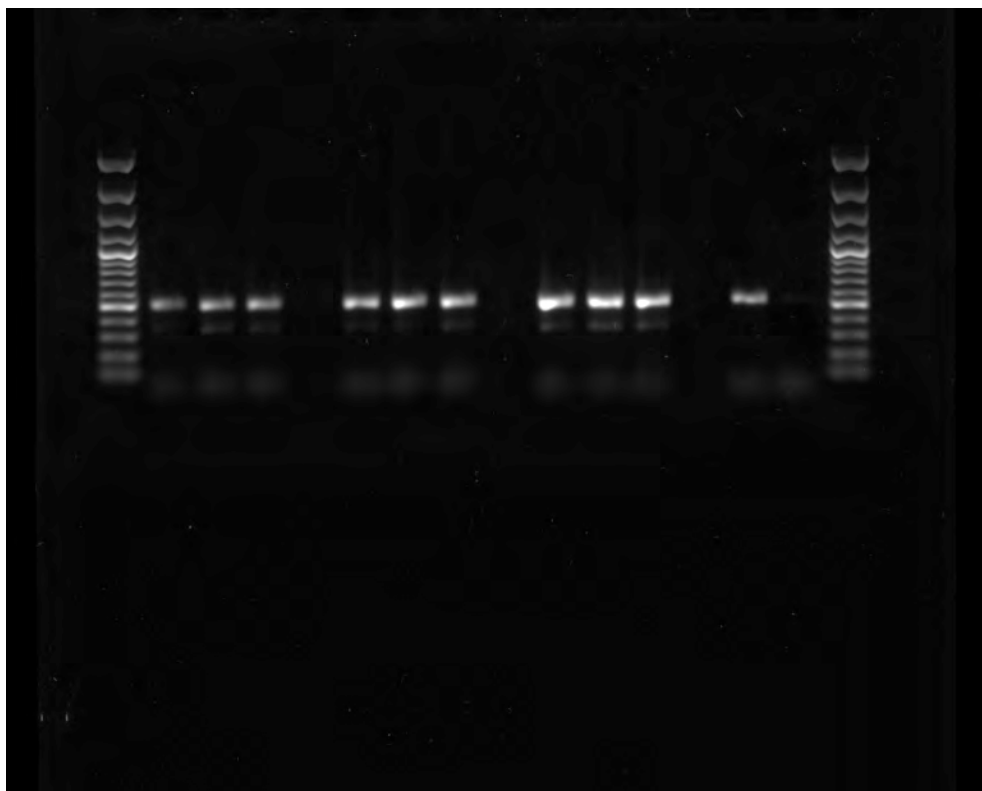

c

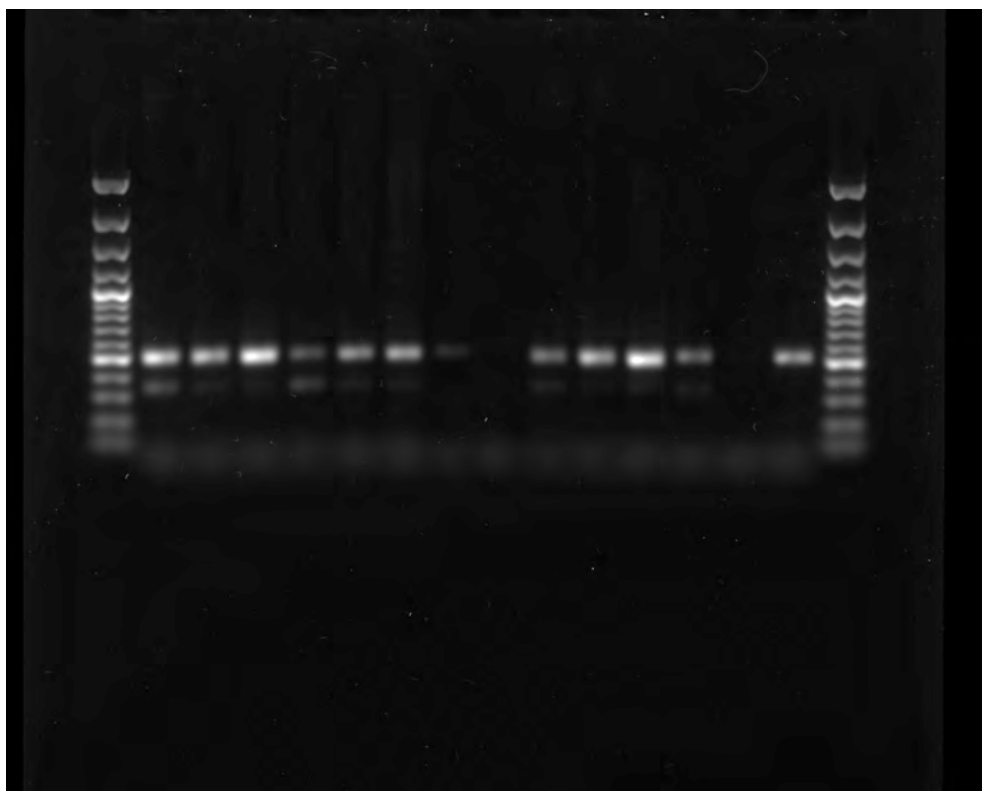

Figure S3

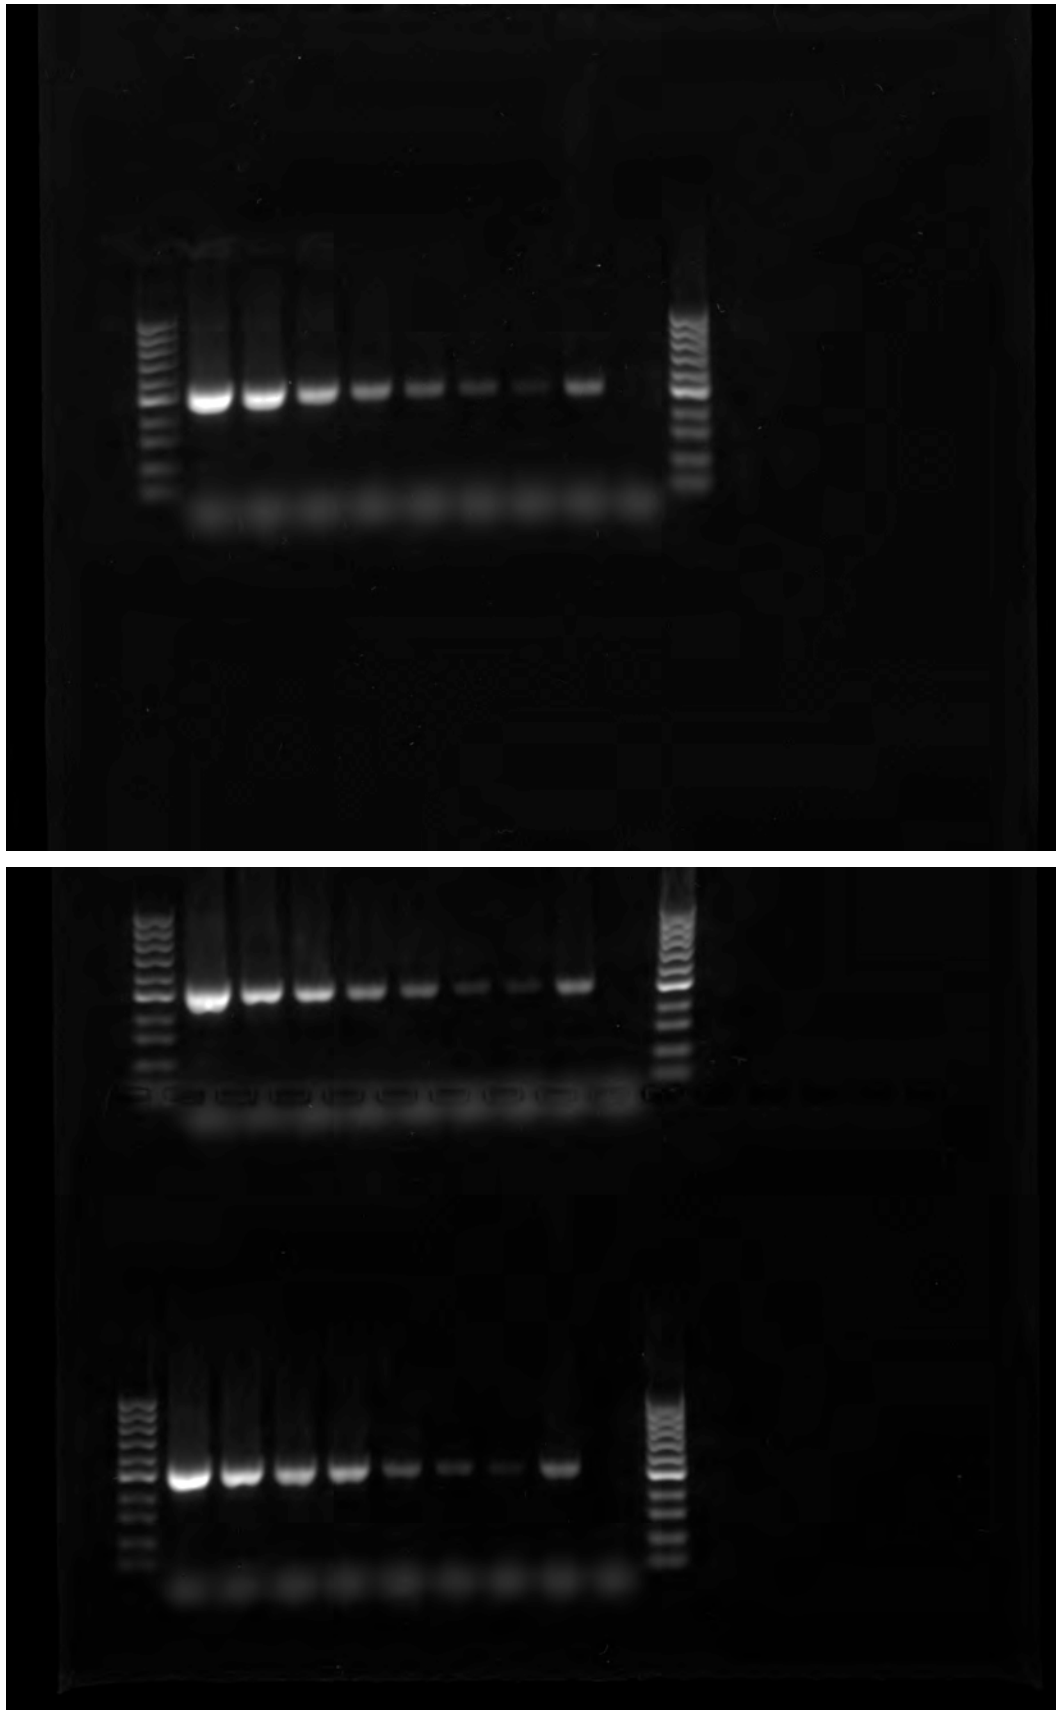

Figure S4

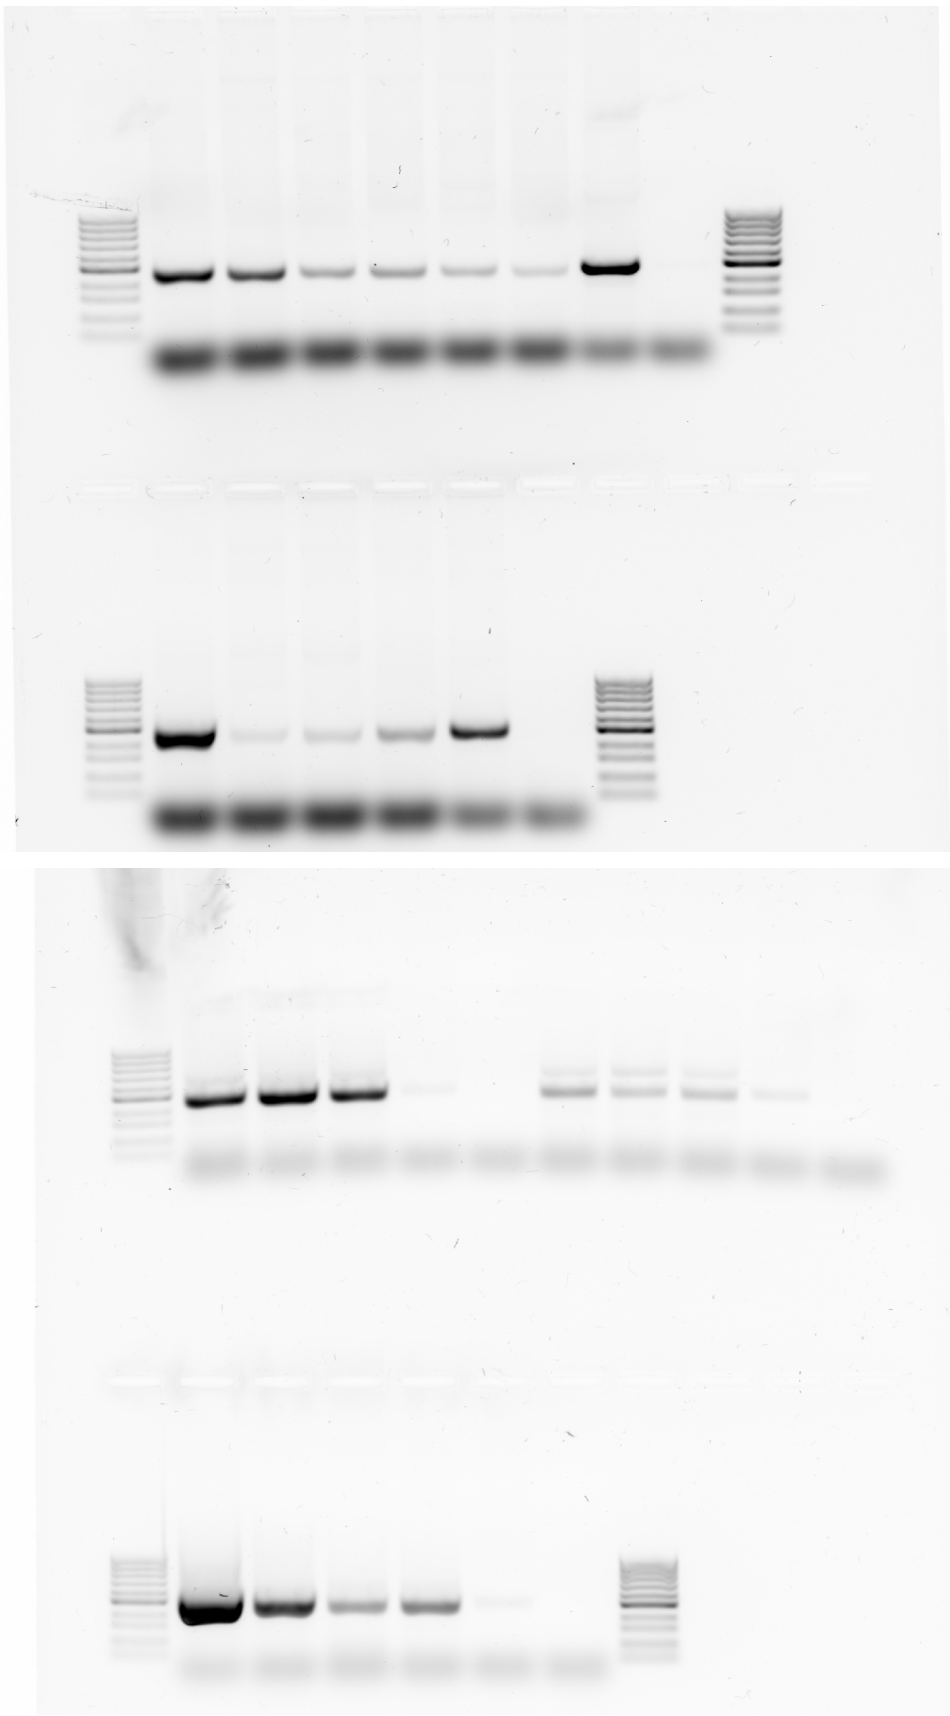

**Figure S5**

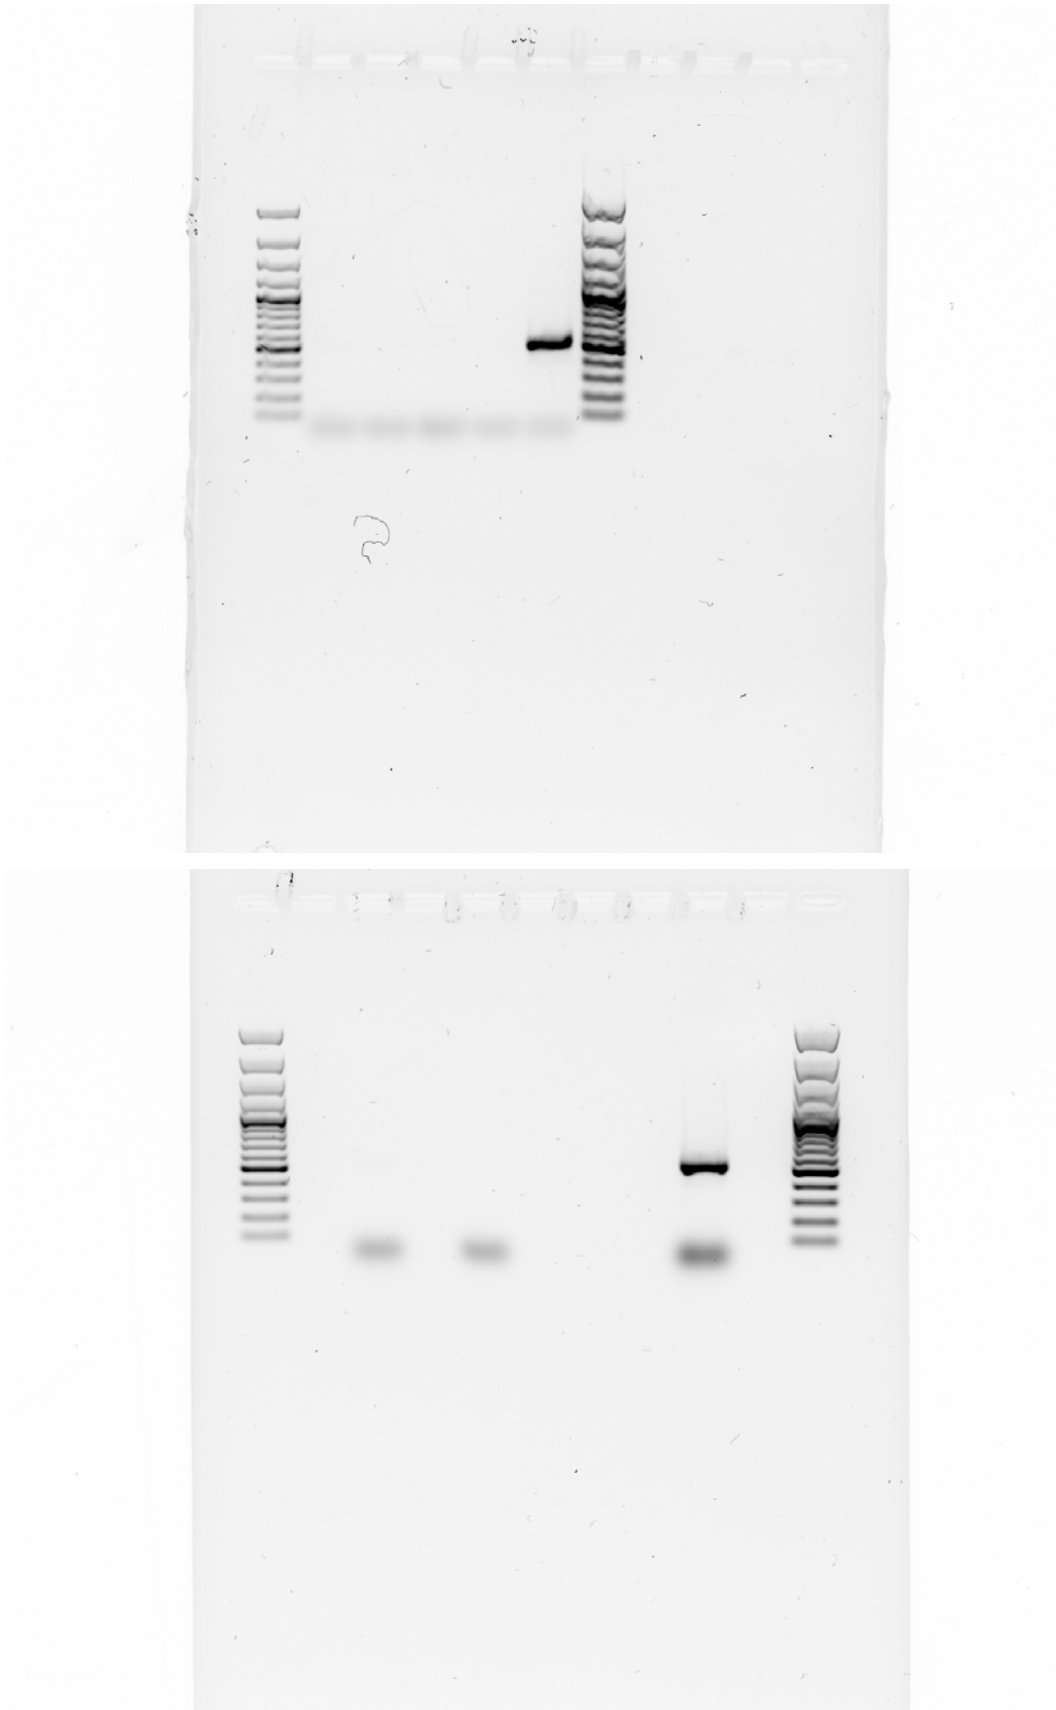

Supplement: MOESM8 [file 41598_2025_969_MOESM8_ESM.pdf]
